# Supplementary material for: Mono- and bis(tetrathiafulvaleno)hexadehydro[12]annulenesElectronic supplementary information (ESI) available: cyclic voltammograms of the annulenes 1 and 2. See http://www.rsc.org/suppdata/cc/b4/b407200f/
Source: Royal Society of Chemistry journal article supplement (doi:10.1039/b407200f), 2004-01-01

The cyclic voltammograms of compound **1**

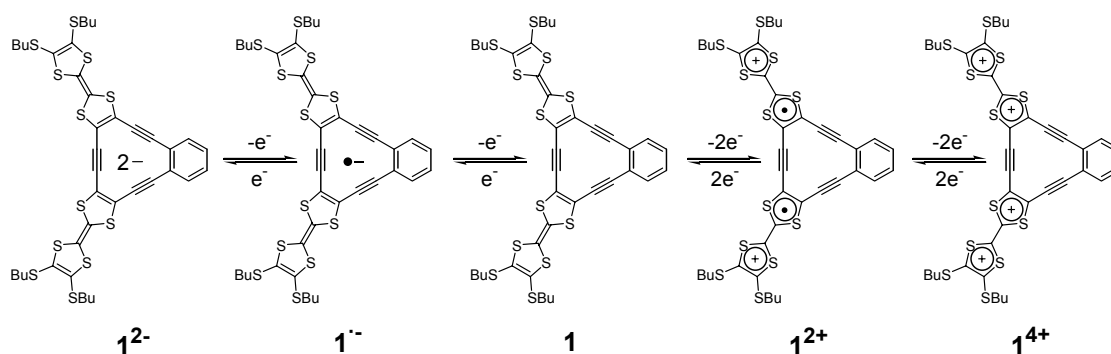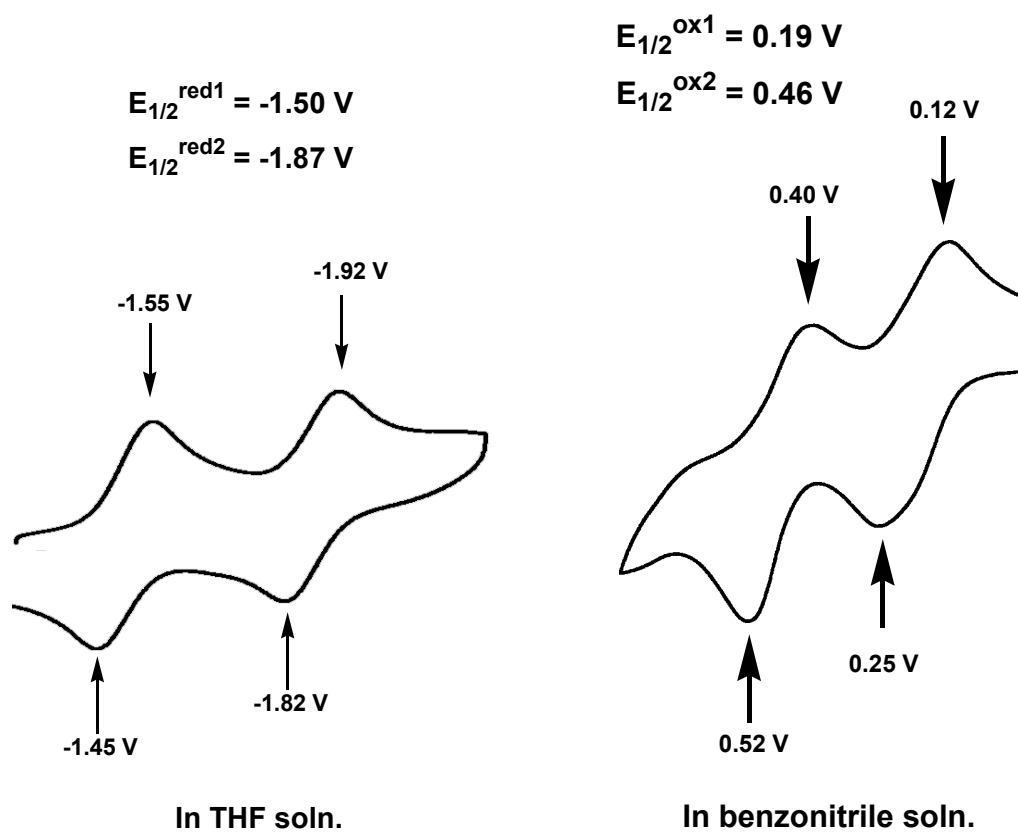

Conditions: 0.1 M  $\text{Bu}_4\text{NClO}_4$ ,  $\text{Ag}/\text{Ag}^+$  reference electrode, Pt counter electrode,  $100 \text{ mV sec}^{-1}$ ;

potentials referred to  $\text{Fc}/\text{Fc}^+$ . In benzonitrile with Pt working electrode. In THF with glassy carbon working electrode.

The cyclic voltammograms of compound **2**

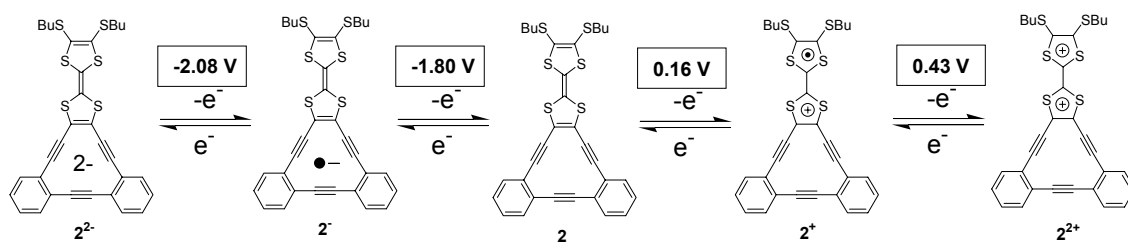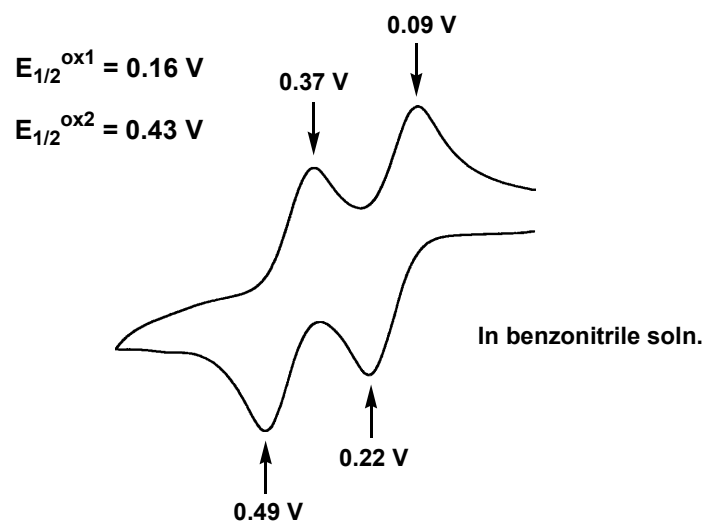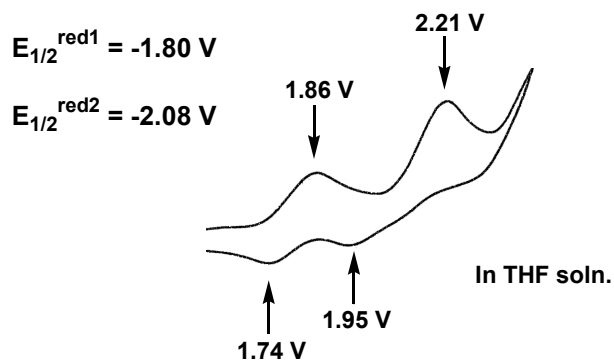

Conditions:  $0.1 \text{ M Bu}_4\text{NClO}_4$ ,  $\text{Ag}/\text{Ag}^+$  reference electrode, Pt counter electrode,  $100 \text{ mV sec}^{-1}$ ;

potentials referred to  $\text{Fc}/\text{Fc}^+$ . In benzonitrile with Pt working electrode. In THF with glassy carbon working electrode.

### LDI-TOF MS of **1** with $\text{AgBF}_4$

%Int. 111 mV[sum= 111 mV] Profiles 1-1 Smooth Av 10 -Baseline 100

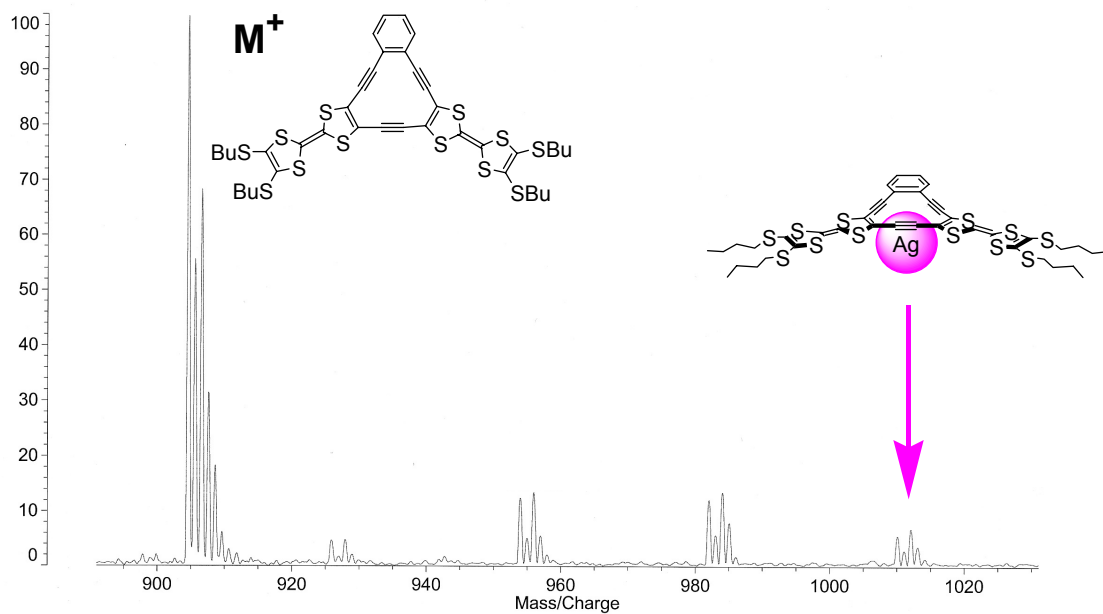

### Expansion

%Int. 7.6 mV[sum= 8 mV] Profiles 1-1 Smooth Av 10 -Baseline 100

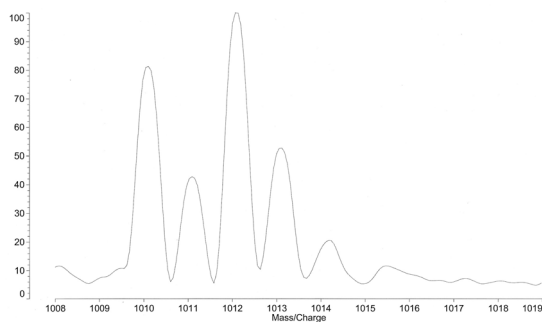

### Calculation

Molecular formula: C<sub>40</sub>H<sub>40</sub>S<sub>12</sub>Ag Resolution: 10000 at 50%

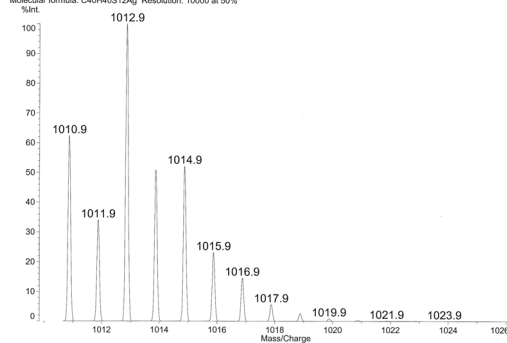

Supplement: b407200f.pdf [file b407200f.pdf]
